# Supplementary material for: Contemporary outcomes of en bloc stapling of the pulmonary artery, bronchus, and lymph nodes during lobectomy for non-small cell lung cancer: a retrospective study
Source: Research Square preprint supplement (doi:10.21203/rs.3.rs-8518736/v1), 2026-02-09
Supplement: Supplementary file 1 [file b20390db2e8b2137486db10e.docx]

Supplementary Table S1. Detailed information of study participants (section I).

| Patient | Age | Sex | Performance status | Smoking history | Dust exposure | CCI | Clinical 　T status | Clinical 　N status | Clinical stage | Site of tumor | Lymph node  uptake on PET | Surgical approach | Extent of pulmonary resection |
| --- | --- | --- | --- | --- | --- | --- | --- | --- | --- | --- | --- | --- | --- |
| A | 73 | Male | 0 | Current | No | 3 | T1c | N0 | IA3 | LLL | No | VATS | Lobectomy |
| B | 74 | Female | 1 | Former | No | 3 | T2a | N1 | IIB | RLL | No | Thoracotomy | Bilobectomy |
| C | 88 | Male | 0 | Former | Unknown | 2 | T1c | N0 | IA3 | RLL | No | VATS | Lobectomy |
| D | 66 | Male | 0 | Former | No | 2 | T2a | N1 | IIB | LLL | Yes | VATS | Lobectomy |
| E | 74 | Male | 0 | Never | No | 1 | T1b | N1 | IIB | LUL | Yes | VATS | Lobectomy |
| F | 86 | Male | 0 | Former | No | 4 | T1b | N0 | IA2 | RUL | No | VATS | Lobectomy |
| G | 80 | Male | 0 | Former | No | 4 | T3 | N1 | IIIA | RLL | Yes | VATS | Lobectomy |
| H | 76 | Male | 1 | Current | No | 2 | T3 | N1 | IIIA | RLL | Yes | Thoracotomy | Lobectomy |
| I | 79 | Male | 0 | Never | Yes | 0 | T1c | N0 | IA3 | LLL | Yes | VATS | Lobectomy |
| J | 67 | Male | 0 | Former | No | 4 | T3 | N0 | IIB | LLL | No | VATS | Lobectomy |
| K | 63 | Male | 0 | Current | No | 4 | T2a | N0 | IB | LLL | No | VATS | Lobectomy |
| L | 65 | Female | 0 | Never | Unknown | 1 | T3 | N1 | IIIA | RLL | Yes | Thoracotomy | Lobectomy |
| M | 84 | Male | 0 | Former | No | 2 | T1c | N0 | IA3 | RUL | Yes | VATS | Lobectomy |
| N | 85 | Male | 0 | Former | No | 2 | T1c | N0 | IA3 | RLL | Yes | VATS | Lobectomy |
| O | 67 | Male | 0 | Former | No | 1 | T2a | N1 | IIB | RLL | Unknown | VATS | Lobectomy |
| P | 77 | Male | 0 | Current | No | 1 | T2a | N0 | IB | RLL | Yes | VATS | Lobectomy |
| Q | 81 | Female | 0 | Never | No | 1 | T3 | N1 | IIIA | RLL | Yes | VATS | Lobectomy |
| R | 78 | Female | 0 | Never | No | 3 | T1a | N0 | IA1 | LUL | Unknown | Thoracotomy | Lobectomy |

CCI, Charlson comorbidity index; LLL, left lower lobe; RLL, right lower lobe; LUL, left upper lobe; RUL, right upper lobe; PET, positron emission tomography; VATS, video-assisted thoracic surgery.

Supplementary Table S2. Detailed information of study participants (section II).

| Patient | PA branches stapled simultaneously | Bronchial branches stapled simultaneously | LN metastases near the stapling site | R-status | Pathological T status | Pathological 　N status | Pathological stage | Histology | EGFR mutation | PD-L1 tumor proportion score |
| --- | --- | --- | --- | --- | --- | --- | --- | --- | --- | --- |
| A | A6-10 | B6-10 | No | 0 | T2a | N0 | IB | Sq | Unknown | 1-49% |
| B | A4-10 | B4-10 | Yes | 2 | T2b | N1 | IIB | Sq | Unknown | ≥ 50% |
| C | A9-10 | B6-10 | No | 0 | T2a | N1 | IIB | Sq | No | ≥ 50% |
| D | A6-10 | B6-10 | Yes | 2 | T2a | N2a | IIIA | Ad | No | < 1% |
| E | A4 | B1-5 | Yes | 2 | T1b | N2a | IIB | Ad | L858R | ≥ 50% |
| F | A2 | B1-3 | No | 0 | T1b | N0 | IA2 | Sq | Unknown | Unknown |
| G | A6-10 | B6-10 | Yes | 2 | T2b | N1 | IIB | Sq | Unknown | < 1% |
| H | A6-10 | B6-10 | No | 0 | T3 | N0 | IIB | Sq | Unknown | ≥ 50% |
| I | A6-10 | B6-10 | No | 0 | T1b | N0 | IA2 | Ad | L858R | 1-49% |
| J | A8-10 | B6-10 | No | 0 | T2a | N0 | IB | Ad | No | 1-49% |
| K | A6 | B6-10 | No | 0 | T1c | N0 | IA3 | Sq | No | 1-49% |
| L | A6-10 | B6-10 | Yes | 1 | T2b | N1 | IIB | Pleo | L858R | ≥ 50% |
| M | A2 | B1-3 | No | 0 | T2a | N0 | IB | Ad | del19 | < 1% |
| N | A6-10 | B6-10 | No | 0 | T3 | N0 | IIB | Sq | No | 1-49% |
| O | A7-10 | B7-10 | No | 0 | T2a | N0 | IB | Sq | Unknown | Unknown |
| P | A6-10 | B6-10 | No | 0 | T4 | N0 | IIIA | Sq | Unknown | Unknown |
| Q | A6-10 | B6-10 | No | 0 | T2b | N0 | IIA | Ad | Unknown | Unknown |
| R | A1-3 | B1-3 | No | 0 | Tis | N0 | 0 | Ad | Unknown | Unknown |

PA, pulmonary artery; Sq, squamous cell carcinoma; Ad, adenocarcinoma; Pleo, pleomorphic carcinoma.

Supplementary Table S3. Detailed information of study participants (section III).

| Patient | Post-operative  mobiditya | Adjuvant therapy | Recurrence or progression | Site of recurrence or progression | Local recurrence or progression | First-line treatment for recurrence or progression | Survival after surgery | Cause of death |
| --- | --- | --- | --- | --- | --- | --- | --- | --- |
| A | - | - | No | - | - | - | Died at 70 months | MSD |
| B | - | RT (60 Gy) | Yes | Ipsilateral  pleura | No | Carboplatin and nab-paclitaxel | Died at 19 months | Lung cancer |
| C | Pulmonary fistula (Grade 3) | - | No | - | - | - | Alive at 35　months | - |
| D | - | Cisplatin and vinorelbine | Yes | A mediastinal lymph node | No | Carboplatin, nab-paclitaxel, and RT (66 Gy), followed by durvalumab | Died at 30 months | Lung cancer |
| E | - | Carboplatin, nab-paclitaxel, and RT (66 Gy), followed by durvalumab | Yes | Brain  (multiple) | No | Osimertinib | Alive at 74　months | - |
| F | - | - | No | - | - | - | Died at 51 months | Cholangitis |
| G | - | - | Yes | A hilar  lymph node and peritoneum | Yes | Carboplatin and nab-paclitaxel | Alive at 7　months |  |
| H | - | - | Yes | A hilar  lymph node | Yes | Best supportive care | Died at 11 months | Lung cancer |
| I | - | - | No | - | - | - | Alive at 55　months |  |
| J | - | - | Yes | Contralateral lung  (multiple) | No | Cytotoxic chemotherapy  (details are unknown) | Alive at 35　months |  |
| K | - | - | Yes | A hilar  lymph node | No | Carboplatin and nab-paclitaxel | Died at 26 months | Lung cancer |
| L | - | Cisplatin and vinorelbine, followed by osimertinib | No | - | - | - | Alive at 31　months |  |
| M | Pulmonary fistula (Grade 3) | - | Yes | Contralateral lung  (multiple) and ipsilateral pleura | No | Osimertinib | Alive at 28　months |  |
| N | - | - | Yes | A mediastinal lymph node | No | Best supportive care | Died at 12 months | Lung cancer |
| O | - | - | Yes | Liver  (single) | No | Carboplatin, nab-paclitaxel, and pembrolizumab | Alive at 20　months |  |
| P | - | - | Yes | A mediastinal lymph node and brain (multiple) | No | Best supportive care | Died at 6 months | Lung cancer |
| Q | - | - | No | - | - | - | Alive at 14　months | - |
| R | - | - | No | - | - | - | Alive at 12　months | - |

aCommon Terminology Criteria for Adverse Events, version 5.0

RT, radiation therapy; MSD, myelodysplastic syndromes.
